# Supplementary material for: UV-Vis-NIR full-range-responsive carbon-rich carbon nitride nanotubes for enhanced photocatalytic performance
Source: Royal Society of Chemistry journal article supplement (doi:10.1039/d1nj05169e), 2022-01-01
Supplement: d1nj05169e1.pdf [file d1nj05169e1.pdf]

## *Supporting Information*

### **UV-Vis-NIR full-range responsive carbon-rich carbon nitride nanotubes for enhanced photocatalytic performance**

*Fan Xu<sup>a,b</sup>, Qi Yao<sup>b</sup>, Yan Zhang<sup>b</sup>, Zhao Mo<sup>a</sup>, Junjie Yuan<sup>a</sup>, Hanxiang Chen<sup>a</sup>, Yanhua Song<sup>c</sup>, Hongbing Ji<sup>d,\*</sup>, Huaming Li<sup>a</sup>, and Hui Xu<sup>a,\*</sup>*

<sup>a</sup> Institute for Energy Research, Jiangsu University, Zhenjiang 212013, P.R. China

<sup>b</sup> Academy of Environmental Planning & Design, Co., Ltd. Nanjing University, Nanjing 210093, P. R. China

<sup>c</sup> School of Environmental and Chemical Engineering, Jiangsu University of Science and Technology, Zhenjiang 212003, P. R. China

<sup>d</sup> Huizhou Research Institute, Sun Yat Sen University, Huizhou 516081, P.R. China

\*Corresponding author: E-mail addresses: jihb@mail.sysu.edu.cn (H. Ji);  
xh@ujs.edu.cn (H. Xu)

## Photocatalytic activity measurements

**Table S1.** Comparison of apparent hydrogen evolution amounts of the reported R-CN and other the similar g-C<sub>3</sub>N<sub>4</sub> based photocatalysts.

| Photocatalyst                                                                                                                  | Light Source                                                                     | Reaction Conditions                 | Hydrogen Evolution Rate ( $\mu\text{mol g}^{-1} \text{h}^{-1}$ ) | Ref.      |
|--------------------------------------------------------------------------------------------------------------------------------|----------------------------------------------------------------------------------|-------------------------------------|------------------------------------------------------------------|-----------|
| R-CN                                                                                                                           | 300 W Xe lamp, $\lambda > 500$ nm                                                | 3 wt% of Pt co-catalyst, TEOA (10%) | 157.8                                                            | This work |
| Au NRs/g-C <sub>3</sub> N <sub>4</sub>                                                                                         | $\lambda > 700$ nm                                                               | TEOA                                | 63.1                                                             | [1]       |
| g-C <sub>3</sub> N <sub>4</sub> with nitrogen defects and cobalt-nitrogen (CoAN) bonds (g-C <sub>3</sub> N <sub>4</sub> -Co-K) | 300 W Xe lamp, NIR                                                               | TEOA (15%)                          | 470                                                              | [2]       |
| black phosphorus/tungsten nitride (BP/WN)                                                                                      | 320 W Xe lamp, $\lambda > 700$ nm                                                | /                                   | 10.77                                                            | [3]       |
| Protonated g-C <sub>3</sub> N <sub>4</sub> (pCN) was modified by pyropheophorbide-a (Ppa) Ppa/pCN                              | 300 W Xe lamp, $\lambda > 780$ nm                                                | 3 wt% of Pt co-catalyst, TEOA (10%) | 68.5                                                             | [4]       |
| Protoporphyrin-modified pGCN (Pp/pGCN)                                                                                         | 300 W Xe lamp, $\lambda > 780$ nm                                                | 3 wt% of Pt co-catalyst, TEOA (10%) | 307.8                                                            | [5]       |
| A <sub>2</sub> BC-type asymmetric zinc phthalocyanine derivative (Zn-di-PcNcTh-2) g-C <sub>3</sub> N <sub>4</sub>              | 300 W Xe lamp, $\lambda > 420$ nm                                                | 1 wt% of Pt co-catalyst, AA (50 mM) | 23200                                                            | [6]       |
| graphited carbon ring domain (CN-GP)                                                                                           | 300 W Xe lamp, $\lambda = 700/800/900$ nm                                        | 2 wt% of Pt co-catalyst, TEOA (10%) | 560.8/398.4/322.8                                                | [7]       |
| carbon/potassium-doped red polymeric carbon nitride (RPCN)                                                                     | 300 W Xe lamp, $500 \leq \lambda \leq 780$ nm/<br>$700 \leq \lambda \leq 780$ nm | 3 wt% of Pt co-catalyst, TEOA (10%) | 640/140                                                          | [8]       |
| graphitic carbon nitride by meso-tetrahydroxyphenylchlorin (mTHPC/pCN)                                                         | 300 W Xe lamp, $\lambda > 780$ nm                                                | 3 wt% of Pt co-catalyst, TEOA (10%) | 78.8                                                             | [9]       |
| Black Phosphorus/Graphitic Carbon Nitride (BP/CN)                                                                              | 320 W Xe lamp, $\lambda > 780$ nm                                                | /                                   | 101                                                              | [10]      |

## References:

- [1] H. Y. Tian, X. Liu, Z. Q. Liang, P. Y. Qiu, X. Qian, H. Z. Cui and J. Tian, Gold Nanorods/g-C<sub>3</sub>N<sub>4</sub> Heterostructures For Plasmon-Enhanced Photocatalytic H<sub>2</sub> Evolution In Visible And Near-Infrared Light, *J. Colloid Interface Sci.*, 2019, **557**, 700 - 708.
- [2] Y. J. Xue, S. C. Lu, Z. Q. Liang, Y. C. Guo, H. Z. Cui and J. Tian, Porous Graphitic Carbon Nitride With Nitrogen Defects And Cobalt-Nitrogen (Coan) Bonds For Efficient Broad Spectrum (Visible And Near-Infrared) Photocatalytic H<sub>2</sub> Production, *J. Colloid Interface Sci.*, 2020, **561**, 719 - 729.
- [3] S. Xu, S. Q. Gong, H. Jiang, P. H Shi, J. C. Fan, Q. J. Xu and Y. L. Min, Z-Scheme Heterojunction Through Interface Engineering For Broad Spectrum Photocatalytic Water Splitting, *Appl. Catal., B*, 2020, **267**, 118661.
- [4] F. Liu and Z. Ma, g-C<sub>3</sub>N<sub>4</sub> Modified By Pyropheophorbide-a For Photocatalytic H<sub>2</sub> Evolution, *Colloids Surf., A*, 2021, **615**, 126128.
- [5] Y. F. Liu, S. F. Kang, L. F. Cui and Z. Ma, Boosting Near-Infrared-Driven Photocatalytic H<sub>2</sub> Evolution Using Protoporphyrin-Sensitized g-C<sub>3</sub>N<sub>4</sub>, *J. Photochem. Photobiol., A*, 2020, **396**, 112517.
- [6] P. Zeng, J. M. Wang, Y. Y. Guo, R. J. Li, G. Q. Mei and T. Y. Peng,\*Synthesis Of An A<sub>2</sub>Bc-Type Asymmetric Zinc Phthalocyanine Derivative For Efficient Visible/Near-Infrared-Driven H<sub>2</sub> Evolution On g-C<sub>3</sub>N<sub>4</sub>, *Chem. Eng. J.*, 2019, **373**, 651 - 659.
- [7] T. Song, G. C. Zeng, P. Y. Zhang, T. T. Wang, S. B. Huang and H. P. Zeng, Ultrathin Carbon Nitride with Atomic-Level Intraplane Implantation of Graphited Carbon Ring Domain for Superior Photocatalytic Activity in the Visible/Near-Infrared Region, *ACS Sustainable Chem. Eng.*, 2019, **7**, 1239 - 1249.
- [8] Y. S. Xu, M. J. Fan, W. J. Yang, Y. H. Xiao, L. T. Zeng, X. Wu, Q. H. Xu, C. L. Su and Q. J. He, Homogeneous Carbon/Potassium-Incorporation Strategy for Synthesizing Red Polymeric Carbon Nitride Capable of Near-Infrared Photocatalytic H<sub>2</sub> Production, *Adv. Mater.*, 2021, **33**, 2101455.

- [9] Y. F. Liu and Z. Ma, g-C<sub>3</sub>N<sub>4</sub> Modified By Meso-Tetrahydroxyphenylchlorin For Photocatalytic Hydrogen Evolution Under Visible/Near-Infrared Light, *Frontiers in Chemistry*, 2020, **8**, 605343.
- [10] M. S. Zhu, S. Kim, L. Mao, M. Fujitsuka, J. Y. Zhang, X. C. Wang and T. Majima, Metal-Free Photocatalyst for H<sub>2</sub> Evolution in Visible to Near-Infrared Region: Black Phosphorus/Graphitic Carbon Nitride, *J. Am. Chem. Soc.*, 2017, **139**, 13234 - 13242.
